# Supplementary material for: Green Synthesis of Silver Nanoparticles Using Acacia ehrenbergiana Plant Cortex Extract for Efficient Removal of Rhodamine B Cationic Dye from Wastewater and the Evaluation of Antimicrobial Activity
Source: PubMed Central journal article supplement (PMC10233848; doi:10.1021/acsomega.3c01292), 2023-05-15
Supplement: ao3c01292_si_001.pdf [file ao3c01292_si_001.pdf]

# Green Synthesis of Silver Nanoparticles Using *Acacia Ehrenbergiana* Plant Cortex Extract for Efficient Removal of Rhodamine B Cationic Dye from Wastewater and the Evaluation of Antimicrobial Activity

Waleed M. Alamier<sup>[1]\*</sup>, Mohammed D. Y. Oteef<sup>[1]</sup>, Ayyob M. Bakry<sup>[1]\*</sup>, Nazim Hasan<sup>[1]</sup>, Khatib Sayeed Ismail<sup>[2]</sup>, and Fathi S. Awad<sup>[3]\*</sup>

<sup>[1]</sup> Department of Chemistry, Faculty of Science, Jazan University, Jazan 45142, Saudi Arabia.

<sup>[2]</sup> Department of Biology, Faculty of Science, Jazan University, Jazan 45142, Saudi Arabia.

<sup>[3]</sup> Chemistry Department, Faculty of Science, Mansoura University, Mansoura 35516, Egypt.

## Supporting Information

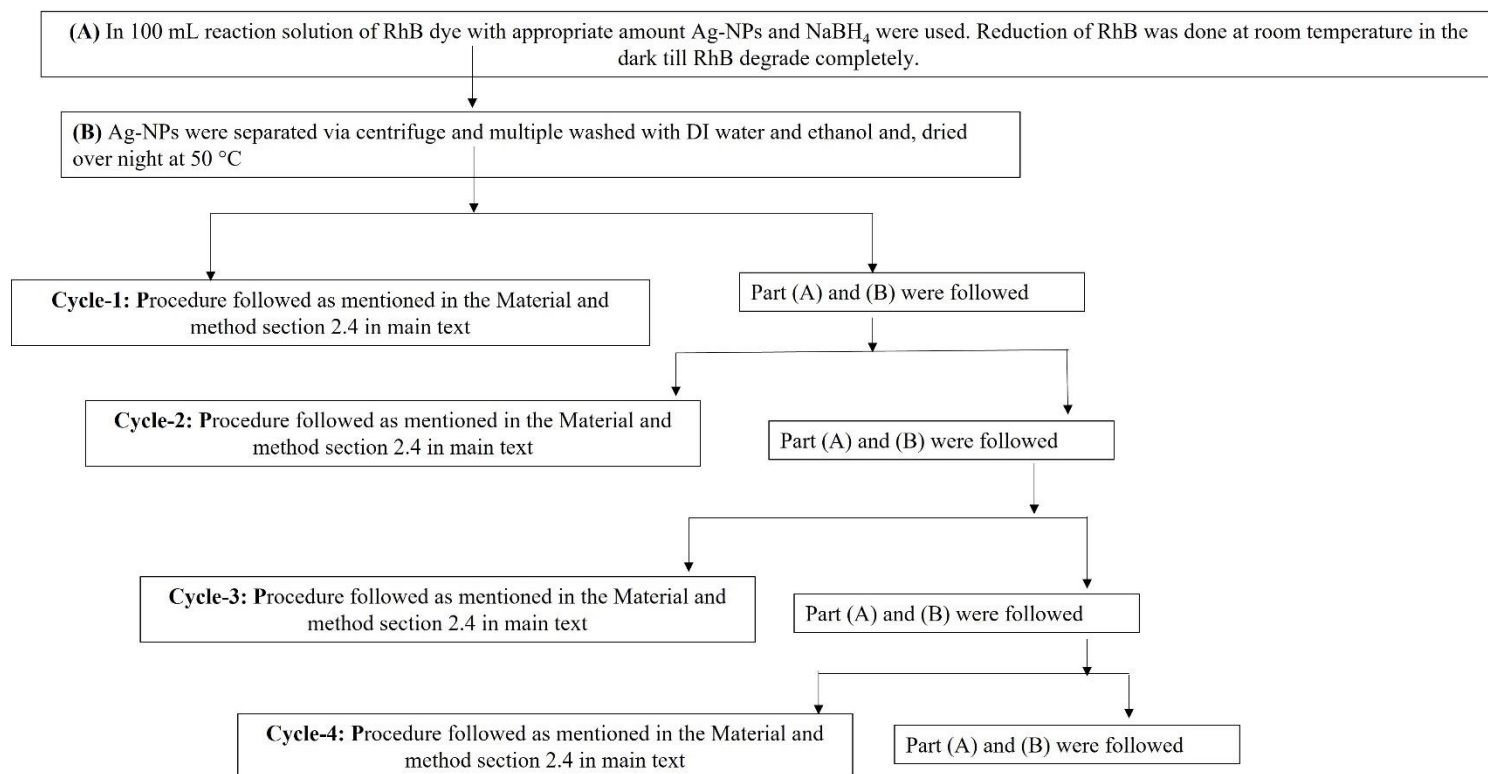

Scheme S1: Recyclability procedure of the AgNPs

Table S1: GC-MS data of the phytochemicals in the aqueous AEPC extract in terms of their retention times (R. Time) in minutes, % Peak area, Similarity Index (S.I) and Molecular weight in (g/mol.).

| Peak No. | R. Time (min) | Peak area (%) | S.I. | Name of Phytochemical               | Molecular weight (g/mol.) |
|----------|---------------|---------------|------|-------------------------------------|---------------------------|
| 1        | 3.089         | 0.59          | 93   | Glycerin                            | 92                        |
| 2        | 4.382         | 0.08          | 93   | Methyl valerate                     | 116                       |
| 3        | 6.380         | 0.09          | 93   | 2(5H)-Furanone                      | 84                        |
| 4        | 6.569         | 0.23          | 90   | 1,2-Cyclopentanedione               | 98                        |
| 5        | 11.037        | 2.52          | 98   | o-Guaiacol                          | 124                       |
| 6        | 14.070        | 0.35          | 95   | n-Dodecane                          | 170                       |
| 7        | 16.409        | 0.73          | 94   | Hydroquinone                        | 110                       |
| 8        | 17.347        | 1.04          | 88   | 4-Hydroxy-3-methylacetophenone      | 150                       |
| 9        | 18.343        | 1.19          | 95   | Syringol                            | 154                       |
| 10       | 19.655        | 0.49          | 88   | Vanillin                            | 152                       |
| 11       | 20.903        | 1.03          | 85   | Raspberry ketone                    | 164                       |
| 12       | 22.902        | 0.27          | 84   | Guaiacylacetone                     | 180                       |
| 13       | 23.695        | 0.34          | 81   | 3,5-Dimethoxyacetophenone           | 180                       |
| 14       | 24.711        | 1.24          | 93   | 3,4,5-Trimethoxyphenol              | 184                       |
| 15       | 25.607        | 0.98          | 85   | Homovanillic acid                   | 182                       |
| 16       | 26.767        | 71.48         | 82   | 3-O-Methyl-D-glucose                | 194                       |
| 17       | 27.585        | 3.39          | 91   | Coniferol                           | 180                       |
| 18       | 31.284        | 1.19          | 96   | Methyl palmitate                    | 270                       |
| 19       | 35.049        | 1.32          | 97   | Methyl stearate                     | 298                       |
| 20       | 36.026        | 0.98          | 92   | Palmitamide                         | 255                       |
| 21       | 37.302        | 1.44          | 86   | 1,8-Diazacyclotetradecane-2,7-dione | 226                       |
| 22       | 39.120        | 3.92          | 93   | Oleamide                            | 281                       |
| 23       | 39.526        | 0.49          | 90   | Stearamide                          | 283                       |
| 24       | 41.450        | 3.04          | 92   | 2-Monopalmitin                      | 330                       |
| 25       | 44.524        | 1.58          | 94   | 1-Monostearin                       | 358                       |

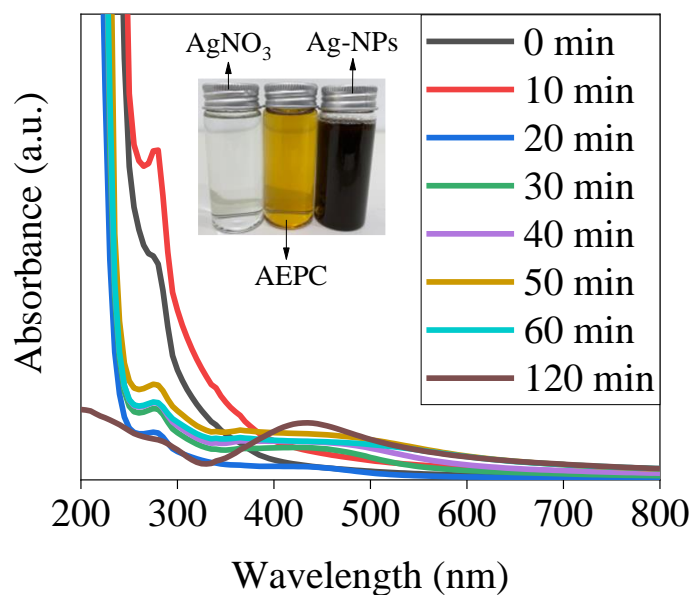

Figure S1. The UV–Vis spectra of the Ag-NPs synthesis as time progress at room temperature and the nanoparticle's color changes.

## Scherrer Equation

$$D = 0.94 \lambda / \beta \cos \theta \quad (S1)$$

Where:  $\beta$  = Line broadening in radians,  $\theta$  = Bragg angle,  $\lambda$  = X-Ray wavelength, and  $D$  = Average Crystallite size.

Table S2: parameters to calculate Ag-NPs sizes from Scherrer Equation

| $\lambda$ (nm) | $2\theta$ (°) | $\theta$ (°) | $\beta$ | $D$ (nm) |
|----------------|---------------|--------------|---------|----------|
| 0.15458        | 38.3          | 19.15        | 0.8     | 10.98    |
| 0.15458        | 44.3          | 22.15        | 0.5     | 17.92    |
| 0.15458        | 64.6          | 32.3         | 0.5     | 19.64    |
| 0.15458        | 77.4          | 38.7         | 0.5     | 21.28    |

Table S3: EDS Elemental Composition of the Ag-NPs

| Element | Weight % | Atomic % | Net Int. |
|---------|----------|----------|----------|
| C K     | 19.74    | 49.18    | 70.17    |
| O K     | 16.07    | 30.05    | 32.48    |
| S K     | 0.79     | 0.73     | 16.32    |
| Cl K    | 4.3      | 3.63     | 84.88    |
| Ag L    | 59.11    | 16.4     | 544.28   |

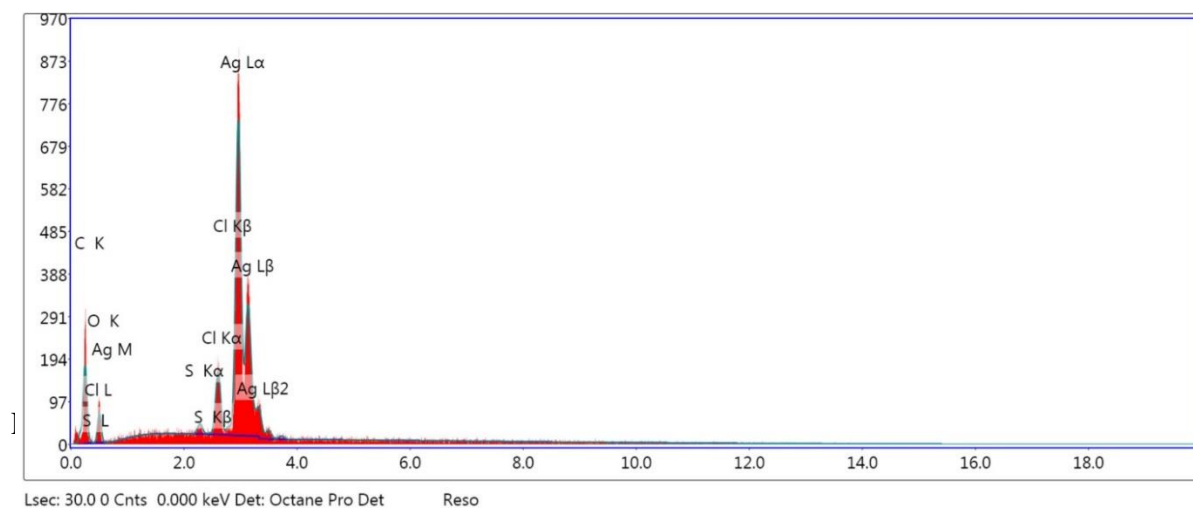

Figure S2. EDS spectrum of the green synthesized Ag-NPs obtained from the AEPC aqueous extract.

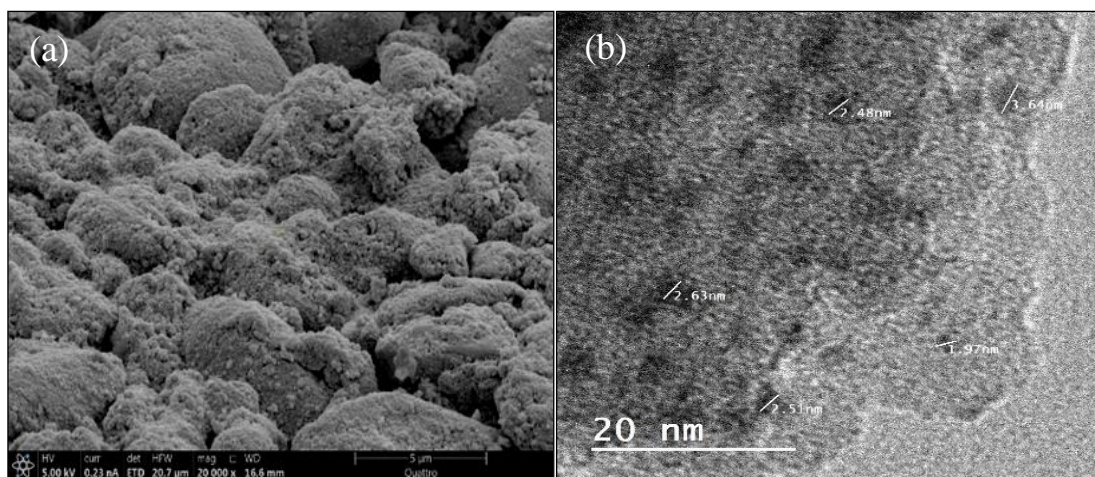

Figure S4. (a) SEM and (b) TEM images of green synthesized Ag-NPs for RhB dye degradation up to three cycles.

Table S4. A comparison of the zero-order rate constants of RhB catalytic reduction using the Ag-NPs from AEPC extract with Ag-NPs in the literature.

| Catalyst | Biological system                  | Size (nm) | Dye            | Rate constant (mol.L <sup>-1</sup> .min <sup>-1</sup> ) | Reference |
|----------|------------------------------------|-----------|----------------|---------------------------------------------------------|-----------|
| Ag-NPs   | Caralluma acutangula plant extract | 2 – 6     | Methelene Blue | 0.0311                                                  | 1         |
| Ag-NPs   | Caralluma acutangula plant extract | 2 – 6     | Cingo Red      | 0.0431                                                  | 1         |
| Ag-NPs   | Acacia Ehrenbergiana plant cortex  | 1 – 40    | Rohdamine B    | 0.0590                                                  | This work |

Table S5: Comparison between previous antimicrobial studies using Ag-nanoparticles with our study.

| No | Common bacteria studied                                                                              | Plant used for NP synthesis           | Antibiotic sensitivity testing Method | Zone of Inhibition (mm)                                                              | MIC ( $\mu\text{g/mL}$ ) | Susceptibility/Resistance to the AgNPs                   | Agreement | Ref |
|----|------------------------------------------------------------------------------------------------------|---------------------------------------|---------------------------------------|--------------------------------------------------------------------------------------|--------------------------|----------------------------------------------------------|-----------|-----|
| 1  | <i>S. aureus</i><br><i>B. cereus</i><br><i>E. coli</i><br><i>P. aeruginosa</i><br><i>C. albicans</i> | <i>Cassia roxburghii</i>              | Synergistic activity with Antibiotics | AgNP alone didn't show inhibitory action, showed synergistic action with Antibiotics | -                        | Susceptible with Antibiotics                             | Agree     | 2   |
| 2  | <i>E. coli</i>                                                                                       | <i>Cestrum nocturnum</i>              | Micro dilution                        | 23                                                                                   | 8                        | Susceptible                                              | Agree     | 3   |
| 3  | <i>S. aureus</i><br><i>E. coli</i>                                                                   | <i>Azadirachta indica</i>             | Disc diffusion                        | 9<br>9                                                                               | -<br>-                   | Susceptible<br>Susceptible                               | Agree     | 4   |
| 4  | <i>E. coli</i>                                                                                       | <i>Capsicum frutescence</i>           | Agar well diffusion                   | 11.5                                                                                 | 80                       | Susceptible                                              | Agree     | 5   |
| 5  | <i>S. aureus</i><br><i>E. coli</i><br><i>K. pneumoniae</i>                                           | <i>Lippia nodiflora</i>               | Disc diffusion                        | 20.3 $\pm$ 0.32<br>22.0 $\pm$ 1.5<br>20.4 $\pm$ 0.76                                 | 50<br>50<br>50           | Susceptible<br>Susceptible<br>Susceptible                | Agree     | 6   |
| 6  | <i>E. coli</i><br><i>K. pneumoniae</i><br><i>P. aeruginosa</i>                                       | <i>Salvia officinalis</i>             | Disc diffusion                        | 37.86 $\pm$ 0.21<br>25.18 $\pm$ 0.27<br>14.27 $\pm$ 0.08                             | 100<br>50<br>50          | Susceptible<br>Susceptible<br>Susceptible                | Agree     | 7   |
| 8  | <i>E. coli</i>                                                                                       | <i>Microwave assisted</i>             | OD growth curve                       | -                                                                                    | 50                       | Susceptible                                              | Agree     | 8   |
| 9  | <i>S. aureus</i> (susceptible strain)<br>MRSA<br><i>E. coli</i>                                      | Sr & Ag loaded nanotubular structures | Zone of inhibition                    | 17<br>19<br>18                                                                       | 40<br>40<br>40           | Susceptible<br>Susceptible<br>Susceptible                | Agree     | 9   |
| 10 | <i>S. aureus</i><br><i>E. coli</i><br><i>P. aeruginosa</i><br><i>C. albicans</i>                     | <i>Rhus coriaria</i><br>L.            | Well diffusion                        | 10 $\pm$ 0.30<br>-<br>14 $\pm$ 0.5<br>12 $\pm$ 0.2                                   | -<br>-<br>-<br>-         | Susceptible<br>Susceptible<br>Susceptible<br>Susceptible | Agree     | 10  |

|    |                                                                                                                                                    |                                                                                              |                         |                                                                                         |                                |                                                                                        |       |           |
|----|----------------------------------------------------------------------------------------------------------------------------------------------------|----------------------------------------------------------------------------------------------|-------------------------|-----------------------------------------------------------------------------------------|--------------------------------|----------------------------------------------------------------------------------------|-------|-----------|
| 11 | <i>S. aureus</i><br><i>E. coli</i><br><i>P. aeruginosa</i>                                                                                         | <i>Semecarpus anacardium</i> ,<br><i>Golchidion lanceolarium</i><br>& <i>Bridelia retusa</i> | Micro dilution          | 43.94±0.2<br>44.02±0.3<br>68.6±0.5<br>Above results with<br>Golchidion plant<br>extract | 70<br>80<br>100                | Susceptible<br>Susceptible<br>Susceptible                                              | Agree | 11        |
| 12 | <i>E. coli</i>                                                                                                                                     | <i>Rhazya stricta</i>                                                                        | Disc diffusion          | Not stated                                                                              | 50                             | Susceptible                                                                            | Agree | 12        |
| 13 | <i>E. coli</i>                                                                                                                                     | <i>Yeast extract</i>                                                                         | Micro dilution          | Not applicable                                                                          | 20                             | Susceptible                                                                            | Agree | 13        |
| 14 | <i>S. aureus</i><br><i>E. coli</i><br><i>K. pneumoniae</i><br><i>P. aeruginosa</i>                                                                 | <i>Microwave irradiation method – Serine as reducing agent</i>                               | Modified Disc diffusion | 16<br>21<br>12<br>21                                                                    | 50<br>50<br>50<br>50           | Susceptible<br>Susceptible<br>Susceptible<br>Susceptible                               | Agree | 14        |
| 15 | <i>S. aureus</i><br><i>E. coli</i>                                                                                                                 |                                                                                              | Tube double dilution    | Not applicable                                                                          | 2                              | Susceptible<br>Susceptible                                                             | Agree | 15        |
| 16 | <i>S. aureus</i> (susceptible strain)<br>MRSA (10 strains)<br><i>E. coli</i><br><i>K. pneumoniae</i><br><i>P. aeruginosa</i><br><i>C. albicans</i> | <i>Acacia ehrenbergiana</i>                                                                  | Well diffusion          | 11<br>9 – 11<br>9<br>10<br>13<br>31                                                     | 5<br>5–25<br>10<br>5<br>5<br>5 | Susceptible<br>Susceptible<br>Susceptible<br>Susceptible<br>Susceptible<br>Susceptible | -     | This work |

## References:

- (1) Alamier, W. M.; Hasan, N.; Ali, S. K.; Oteef, M. D. Y. Biosynthesis of Ag Nanoparticles Using *Caralluma acutangula* Extract and Its Catalytic Functionality towards Degradation of Hazardous Dye Pollutants. *Crystals* 2022, 12 (8), 1069.
- (2) Moteriya, P.; Padalia, H.; Chanda, S. Characterization, synergistic antibacterial and free radical scavenging efficacy of silver nanoparticles synthesized using *Cassia roxburghii* leaf extract. *Journal of Genetic Engineering and Biotechnology* 2017, 15 (2), 505-513. DOI: <https://doi.org/10.1016/j.jgeb.2017.06.010>.
- (3) Keshari, A. K.; Srivastava, R.; Singh, P.; Yadav, V. B.; Nath, G. Antioxidant and antibacterial activity of silver nanoparticles synthesized by *Cestrum nocturnum*. *J Ayurveda Integr Med* 2020, 11 (1), 37-44. DOI: 10.1016/j.jaim.2017.11.003 From NLM.
- (4) Ahmed, S.; Ullah, S.; Ahmad, M.; Swami, B.; Ikram, S. Green synthesis of silver nanoparticles using *Azadirachta indica* aqueous leaf extract. *Journal of radiation research and applied sciences* 2015, 9. DOI: 10.1016/j.jrras.2015.06.006.
- (5) Shankar, T.; Karthiga, P.; Swarnalatha, K.; Rajkumar, K. Green synthesis of silver nanoparticles using *Capsicum frutescens* and its intensified activity against *E. coli*. *Resource-Efficient Technologies* 2017, 3 (3), 303-308. DOI: <https://doi.org/10.1016/j.reffit.2017.01.004>.
- (6) Sudha, A.; Jeyakanthan, J.; Srinivasan, P. Green synthesis of silver nanoparticles using *Lippia nodiflora* aerial extract and evaluation of their antioxidant, antibacterial and cytotoxic effects. *Resource-Efficient Technologies* 2017, 3 (4), 506-515. DOI: <https://doi.org/10.1016/j.reffit.2017.07.002>.
- (7) Yassin, M. T.; Mostafa, A. A.; Al-Askar, A. A.; Al-Otibi, F. O. Synergistic Antibacterial Activity of Green Synthesized Silver Nanomaterials with Colistin Antibiotic against Multidrug-Resistant Bacterial Pathogens. In *Crystals*, 2022; Vol. 12.
- (8) Hong, X.; Wen, J.; Xiong, X.; Hu, Y. Shape effect on the antibacterial activity of silver nanoparticles synthesized via a microwave-assisted method. *Environ Sci Pollut Res Int* 2016, 23 (5), 4489-4497. DOI: 10.1007/s11356-015-5668-z From NLM.
- (9) Cheng, H.; Xiong, W.; Fang, Z.; Guan, H.; Wu, W.; Li, Y.; Zhang, Y.; Alvarez, M. M.; Gao, B.; Huo, K.; et al. Strontium (Sr) and silver (Ag) loaded nanotubular structures with combined osteoinductive and antimicrobial activities. *Acta Biomater* 2016, 31, 388-400. DOI: 10.1016/j.actbio.2015.11.046 From NLM.
- (10) Gur, T. Green synthesis, characterizations of silver nanoparticles using sumac (*Rhus coriaria* L.) plant extract and their antimicrobial and DNA damage protective effects. *Front Chem* 2022, 10, 968280. DOI: 10.3389/fchem.2022.968280 From NLM.
- (11) Mohanta, Y. K.; Biswas, K.; Jena, S. K.; Hashem, A.; Abd Allah, E. F.; Mohanta, T. K. Antibiofilm and Antibacterial Activities of Silver Nanoparticles Synthesized by the Reducing Activity of Phytoconstituents Present in the Indian Medicinal Plants. *Front Microbiol* 2020, 11, 1143. DOI: 10.3389/fmicb.2020.01143 From NLM.
- (12) Shehzad, A.; Qureshi, M.; Jabeen, S.; Ahmad, R.; Alabdallal, A. H.; Aljafary, M. A.; Al-Suhaimi, E. Synthesis, characterization and antibacterial activity of silver nanoparticles using *Rhazya stricta*. *PeerJ* 2018, 6, e6086. DOI: 10.7717/peerj.6086 From NLM.



- (13) Shu, M.; He, F.; Li, Z.; Zhu, X.; Ma, Y.; Zhou, Z.; Yang, Z.; Gao, F.; Zeng, M. Biosynthesis and Antibacterial Activity of Silver Nanoparticles Using Yeast Extract as Reducing and Capping Agents. *Nanoscale Research Letters* 2020, 15 (1), 14. DOI: 10.1186/s11671-019-3244-z.
- (14) Jayaprakash, N.; Judith Vijaya, J.; John Kennedy, L.; Priadharsini, K.; Palani, P. Antibacterial activity of silver nanoparticles synthesized from serine. *Mater Sci Eng C Mater Biol Appl* 2015, 49, 316-322. DOI: 10.1016/j.msec.2015.01.012 From NLM.
- (15) Yu, L.; Zhang, Y.; Zhang, B.; Liu, J. Enhanced antibacterial activity of silver nanoparticles/halloysite nanotubes/graphene nanocomposites with sandwich-like structure. *Sci Rep* 2014, 4, 4551. DOI: 10.1038/srep04551 From NLM.
